# Supplementary material for: Application of Novel Technologies in Cardiac Electrotherapy to Prevent Complications
Source: MDPI journal article supplement (doi:10.3390/diagnostics13091584), 2023-04-28
Supplement: s1 [file s1]

**Supplementary Table S1.** Summary of studies reporting lead dislodgment into the pulmonary artery.

| Author,                       | Country, year | Studied population                                                                                | Main findings                                                                                                                                                                                                                                             | Treatment                                                                                                                                                          | Efficacy                                                                                                                                                                                                                       |
|-------------------------------|---------------|---------------------------------------------------------------------------------------------------|-----------------------------------------------------------------------------------------------------------------------------------------------------------------------------------------------------------------------------------------------------------|--------------------------------------------------------------------------------------------------------------------------------------------------------------------|--------------------------------------------------------------------------------------------------------------------------------------------------------------------------------------------------------------------------------|
| Original research             |               |                                                                                                   |                                                                                                                                                                                                                                                           |                                                                                                                                                                    |                                                                                                                                                                                                                                |
| Polewczyk, M.; et al. [13]    | Poland, 2016  | 1767 TLEs was carried out, including a group of 19 patients with LDPA                             | The presence of LDPA was associated with frequent occurrence of intracardiac lead abrasion (increase by 316%) and isolated LRIE (increase by 500%)                                                                                                        | TLE                                                                                                                                                                | Long-term mortality after TLE was comparable in patients with LDPA are comparable to those in standard TLE procedures                                                                                                          |
| Paskudzka, D.; et al. [14]    | Poland, 2018  | 3 patients (patient A 63 year old woman, patient B 31 year old woman, patient C 83 yea old woman) | Patient A: mild PR and TR in TTE                                                                                                                                                                                                                          |                                                                                                                                                                    |                                                                                                                                                                                                                                |
|                               |               |                                                                                                   | Patient B: no signs, dislocation seen on the CXR<br>Patient C: - clinically: symptomatic bradycardia 35/min, - ECG: periodic ineffective ventricular pacing - TTE: PR - device control: increased capture threshold and impedance of the ventricular lead | Patient A: conservative treatment, Patient B: reduction of the lead body excess during the pulse generator replacement, Patient C: TLE and a new CIED implantation | Patient A: stable lead position, stable electrical and TTE parameters. Patient B : a proper lead position. Patient C: systematically increasing TR, features of PH with a proper position of the implanted lead in control TTE |
| Case reports                  |               |                                                                                                   |                                                                                                                                                                                                                                                           |                                                                                                                                                                    |                                                                                                                                                                                                                                |
| Dalvi, B.V.; et al. [26]      | India, 1990   | Not precised, adult                                                                               | pacemaker lead migration to the RPA with septic pulmonary embolism                                                                                                                                                                                        | Cefuroxamine i.v.                                                                                                                                                  | Not precised                                                                                                                                                                                                                   |
| Drögemulle r, A.; et al. [23] | Germany, 2003 | Adult patient                                                                                     | Split pacemaker lead in the PA, hemorrhagic pleural effusion, increase in stimulation treashold                                                                                                                                                           | Catheter-based rescue of displaced lead, capping and fixing                                                                                                        | Good clinical effect                                                                                                                                                                                                           |
| Golzio, P.G.; et al. [29]     | Italy, 2007   | Not precised, adult                                                                               | CXR: inner coil of an atrial lead in the RPA                                                                                                                                                                                                              | TLE                                                                                                                                                                | Not precised                                                                                                                                                                                                                   |
| Udyavar, A.R.; et al. [22]    | India, 2008   | 56-year-old man                                                                                   | Repeated lead fracture and migration of the lead into pulmonary circulation                                                                                                                                                                               | Pacemaker implantation with a tined steroid eluting                                                                                                                | Not precised                                                                                                                                                                                                                   |

|                            |                 |                     |                                                                                                                                                                                                                                                                       |                                                                                                                                  |                                                                                                            |
|----------------------------|-----------------|---------------------|-----------------------------------------------------------------------------------------------------------------------------------------------------------------------------------------------------------------------------------------------------------------------|----------------------------------------------------------------------------------------------------------------------------------|------------------------------------------------------------------------------------------------------------|
|                            |                 |                     | <p>Clinically: recurrent syncope</p> <p>Device control: battery 0%</p> <p>CXR: migration of the lead into pulmonary circulation</p>                                                                                                                                   | <p>lead; due to complicated anatomy (azygous vein draining into SVC) no extraction of the earlier endocardial leads was made</p> |                                                                                                            |
| Tay, J.K.Y.; et al. [17]   | Edinburgh, 2009 | 74-year-old man     | <p>Device control: increased capture threshold,</p> <p>CXR: linear shadow in the left lung, fracture of the lead into 3 segments, one of them migrated into the LPA and the lung, loop of electrode in RV and atrium</p>                                              | <p>Lead extraction and implantation of new pacemaker, a 15 cm loose fragment of lead was removed from RA</p>                     | <p>repeated CXR suggested further migration of the lead fragment within the PA</p>                         |
| Małecka, B.; et al. [32]   | Poland, 2010    | 27-year-old woman   | <p>Irregular electric discharges and noises made by ICD, displacement of the left lead end to RPA</p>                                                                                                                                                                 | <p>Removal of the displaced lead, implantation of new ICD</p>                                                                    | <p>Discharged home in good general condition</p>                                                           |
| Stein, A.; et al. [28]     | Germany, 2011   | 49-year-old patient | <p>Recurrent VF and VT caused by pacemaker lead migrated to the pulmonary trunk</p>                                                                                                                                                                                   | <p>Not precised</p>                                                                                                              | <p>Not precised</p>                                                                                        |
| Erkan, H.; et al. [18]     | Turkey, 2014    | 78-year-old man     | <p>In TTE and CT right abandoned subclavian lead had migrated to the PA. Proximal tip was embolised</p>                                                                                                                                                               | <p>No intervention</p>                                                                                                           | <p>No complications and no clinical signs, the lead remained silent</p>                                    |
| Polewczyk, M.; et al. [16] | Poland, 2015    | 56-year-old man     | <p>Clinically: signs of LRIE, shortness of breath, fever, cough</p> <p>Chest CT: signs of inflammation of mid-right pulmonary lobe, migration of the lead to the PA and lungs</p> <p>TTE: dilatation of RA and RV, high PASP (80 mmHg)</p> <p>TEE: no vegetations</p> | <p>TLE</p>                                                                                                                       | <p>No complications, no signs of lead fragments or vegetations in TTE/TEE, reduction of PASP (60 mmHg)</p> |

|                           |               |                 |                                                                                                                                                                                          |                                                                                                                           |                                                                                  |
|---------------------------|---------------|-----------------|------------------------------------------------------------------------------------------------------------------------------------------------------------------------------------------|---------------------------------------------------------------------------------------------------------------------------|----------------------------------------------------------------------------------|
| Michalak, M.; et al. [15] | Poland, 2015  | 57-year-old man | Complete breakdown and migration of the lead into PA                                                                                                                                     |                                                                                                                           |                                                                                  |
|                           |               |                 | Clinically: mild asymptomatic bradycardia, pectoral muscle contractions depending on body position, pacemaker control: lead impedance >2000 Ohms, lack of proper sensing and stimulation | TLE                                                                                                                       | Patient was discharged home 3 days after the procedure in good general condition |
|                           |               |                 | CXR: lead breakage at the level the right clavicle, migration of the proximal fragment of the broken lead to the LPA                                                                     |                                                                                                                           |                                                                                  |
| Enab, H.; et al. [25]     | England, 2021 | 89-year-old man | Device control: RV threshold rise                                                                                                                                                        | Extraction of the lead and implantation of the new RV lead                                                                | No complications                                                                 |
|                           |               |                 | CXR: first - loop of RV lead in the RVOT, later on displacement of the lead to RPA                                                                                                       |                                                                                                                           |                                                                                  |
| Kumar, R.; et al. [24]    | India, 2022   | 8-year-old boy  | Clinically: fever, cyanosis, clubbing                                                                                                                                                    | Antibiotics, emergency surgery - closure of ASD, removal of pulse generator and endocardial leads, pulmonary valve repair | Mild TR, resolution of pulmonary stenosis                                        |
|                           |               |                 | TTE: atrial vegetations and moderate TR                                                                                                                                                  |                                                                                                                           |                                                                                  |
|                           |               |                 | CXR: prolapsed lead loop into the RVOT and pulmonary valve                                                                                                                               |                                                                                                                           |                                                                                  |
|                           |               |                 | ECG: VT                                                                                                                                                                                  |                                                                                                                           |                                                                                  |

Abbreviations: ASD atrial septal defect; CIED cardiac implantable electronic device; CT computed tomography; CXR chest X-ray; ECG electrocardiography; ICD implantable cardioverter-defibrillator; LDPA leads dislodged into the pulmonary artery; LPA left pulmonary artery, LRIE lead-related infective endocarditis; PA pulmonary artery; PASP pulmonary artery systolic pressure; PH pulmonary hypertension; PR pulmonary regurgitation; RA right atrium, RPA right pulmonary artery; RV right ventricle, RVOT right ventricle outflow tract; SVC superior vena cava; TEE transesophageal echocardiography; TLE transvenous lead extraction; TR tricuspid regurgitation; TTE transthoracic echocardiography; VF ventricular fibrillation; VT ventricular tachycardia
