# Supplementary material for: Application of Novel Technologies in Cardiac Electrotherapy to Prevent Complications
Source: Diagnostics (Basel). 2023 Apr 28;13(9):1584. doi: 10.3390/diagnostics13091584 (PMC10178181; doi:10.3390/diagnostics13091584)
Supplement: Supplementary file 1 [file diagnostics-13-01584-s001.zip]

Archive with 6 entries (6 files):
- Supplementary Table S1.pdf
- Supplementary Video S1.avi
- Supplementary Video S2.avi
- Supplementary Video S3.avi
- Supplementary Video S4.avi
- Supplementary Video S5.avi
